# Supplementary material
Source: Springer Nature journal article supplement (https://www.springermedizin.de/resource/supplementary/12874_2005_114_MOESM1_ESM.pdf/9433798)
Supplement: MOESM1 [file 9433798]

**Abstracts produced by search strategy**

**375**

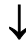

**EXCLUSION:**

Publications < 1992

**N = 6**

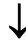

**EXCLUSION:**

Duration of treatment < 12 weeks

**N = 87**

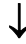

**EXCLUSION:**

Design not double-blind, cross-over, no placebo, no randomization, only placebo wash-out phase

**N = 66**

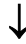

**EXCLUSION:**

Population (Healthy volunteers, Age < 18 years)

**N = 23**

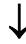

**EXCLUSION:**

Language (Russian, Finnish) or not available

**N = 6**

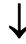

**EXCLUSION:**

Data (no effect parameter or information insufficient for calculation of response rates, abstracts, letters, phase 1 or phase 2 studies)

**N = 46**

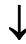

**Inclusion: N = 141 Studies**
